# Supplementary material for: Neutrophils promote T-cell activation through the regulated release of CD44-bound Galectin-9 from the cell surface during HIV infection
Source: PubMed Central journal article supplement (PMC8407585; doi:10.1371/journal.pbio.3001387), 2021-08-19
Supplement: pbio.3001387.s009.pdf [file pbio.3001387.s009.pdf]

**Supplementary Table 1** Participants demographic and clinical data.

| <b>PTID</b> | <b>Sex</b> | <b>Plasma viral load (copies/mL<sup>-1</sup>)</b> | <b>CD4 count (mL<sup>-1</sup>)</b> | <b>On ART</b> |
|-------------|------------|---------------------------------------------------|------------------------------------|---------------|
| ART-1       | M          | <30                                               | 720                                | yes           |
| ART-2       | M          | <30                                               | 570                                | yes           |
| ART-3       | M          | <30                                               | 1080                               | yes           |
| ART-4       | F          | <30                                               | 350                                | yes           |
| ART-5       | M          | 1399                                              | 800                                | yes           |
| ART-6       | M          | <30                                               | 720                                | yes           |
| ART-7       | M          | <30                                               | 830                                | yes           |
| ART-8       | M          | <30                                               | 460                                | yes           |
| ART-9       | M          | <30                                               | 470                                | yes           |
| ART-10      | F          | <30                                               | 310                                | yes           |
| ART-11      | M          | <30                                               | 350                                | yes           |
| ART-12      | M          | <30                                               | 850                                | yes           |
| ART-13      | M          | <30                                               | 740                                | yes           |
| ART-14      | M          | <30                                               | 680                                | yes           |
| ART-15      | M          | <30                                               | 470                                | yes           |
| ART-16      | M          | <30                                               | 550                                | yes           |
| ART-17      | F          | 208                                               | 389                                | yes           |
| ART-18      | M          | <30                                               | 320                                | yes           |
| ART-19      | M          | <30                                               | 580                                | yes           |
| ART-20      | F          | <30                                               | 590                                | yes           |
| ART-21      | M          | <30                                               | 680                                | yes           |
| ART-22      | M          | <30                                               | 370                                | yes           |
| ART-23      | M          | <30                                               | 420                                | yes           |
| ART-24      | M          | <30                                               | 210                                | yes           |
| ART-25      | M          | <30                                               | 500                                | yes           |
| ART-26      | M          | <30                                               | 640                                | yes           |
| ART-27      | M          | <30                                               | 260                                | yes           |
| ART-28      | F          | <30                                               | 700                                | yes           |
| ART-29      | F          | <30                                               | 720                                | yes           |
| ART-30      | M          | <30                                               | 910                                | yes           |
| ART-31      | F          | 168                                               | 290                                | yes           |
| ART-32      | F          | <30                                               | 180                                | yes           |
| ART-33      | M          | <30                                               | 680                                | yes           |
| ART-34      | M          | <30                                               | 510                                | yes           |
| ART-35      | M          | <30                                               | 1210                               | yes           |
| ART-36      | F          | <30                                               | 550                                | yes           |
| ART-37      | F          | 60                                                | 910                                | yes           |
| ART-38      | F          | <30                                               | 190                                | yes           |
| ART-39      | M          | <30                                               | 340                                | yes           |
| ART-40      | F          | 160                                               | 60                                 | yes           |
| ART-41      | M          | <30                                               | 390                                | yes           |

|        |   |     |     |     |
|--------|---|-----|-----|-----|
| ART-42 | M | <30 | 250 | yes |
| ART-43 | M | <30 | 520 | yes |
| ART-44 | M | <30 | 610 | yes |
| ART-45 | M | <30 | 360 | yes |
| ART-46 | M | <30 | 290 | yes |
| ART-47 | M | <30 | 250 | yes |
| ART-48 | M | <30 | 260 | yes |
| AET-49 | M | <30 | 342 | yes |
| ART-50 | F | <30 | 457 | yes |
| ART-51 | M | <30 | 632 | yes |
| ART-52 | M | 540 | 578 | yes |
| ART-53 | F | 990 | 350 | yes |
| ART-54 | M | <30 | 602 | yes |
| ART-55 | M | <30 | 575 | yes |
| ART-56 | M | 800 | 251 | yes |
| ART-57 | M | <30 | 790 | yes |
| ART-58 | M | <30 | 850 | yes |
| ART-59 | M | 125 | 783 | yes |
| ART-60 | M | <30 | 765 | yes |
| ART-61 | M | <30 | 562 | yes |
| ART-62 | F | <30 | 690 | yes |
| ART-63 | F | <30 | 720 | yes |
| ART-64 | F | 89  | 307 | yes |
| ART-65 | F | <30 | 333 | yes |
| ART-66 | M | 403 | 463 | yes |
| ART-67 | F | <30 | 305 | yes |
| ART-68 | M | <30 | 447 | yes |
| ART-69 | M | <30 | 479 | yes |
| ART-70 | M | <30 | 798 | yes |
| ART-71 | M | 733 | 156 | yes |
| ART-72 | M | 172 | 382 | yes |
| ART-73 | F | <30 | 390 | yes |
| ART-74 | M | <30 | 335 | yes |
| ART-74 | M | <30 | 414 | yes |
| ART-76 | M | <30 | 259 | yes |
| ART-77 | F | <30 | 551 | yes |
| ART-78 | M | 153 | 329 | yes |
| ART-79 | M | <30 | 239 | yes |
| ART-80 | M | <30 | 396 | yes |
| ART-81 | M | <30 | 321 | yes |
| ART-82 | M | <30 | 408 | yes |
| ART-83 | F | <30 | 637 | yes |
| ART-84 | M | <30 | 748 | yes |
| ART-85 | M | 476 | 556 | yes |

|         |   |      |     |     |
|---------|---|------|-----|-----|
| ART-86  | M | <30  | 621 | yes |
| ART-87  | M | <30  | 547 | yes |
| ART-88  | M | 167  | 448 | yes |
| ART-89  | F | <30  | 787 | yes |
| ART-90  | M | <30  | 357 | yes |
| ART-91  | F | <30  | 312 | yes |
| ART-92  | M | <30  | 741 | yes |
| ART-93  | M | <30  | 458 | yes |
| ART-94  | M | <30  | 620 | yes |
| ART-95  | F | <30  | 280 | yes |
| ART-96  | M | <30  | 254 | yes |
| ART-97  | M | <30  | 572 | yes |
| ART-98  | M | 650  | 480 | yes |
| ART-99  | M | <30  | 658 | yes |
| ART-100 | M | <30  | 312 | yes |
| ART-101 | F | 1234 | 274 | yes |
| ART-102 | M | <30  | 783 | yes |
| ART-103 | M | <30  | 765 | yes |
| ART-104 | M | 200  | 262 | yes |
| ART-105 | F | <30  | 490 | yes |
| ART-106 | F | <30  | 710 | yes |
| ART-107 | M | <30  | 317 | yes |
| ART-108 | M | <30  | 233 | yes |
| ART-109 | F | 250  | 473 | yes |
| ART-110 | M | <30  | 325 | yes |
| ART-111 | F | <30  | 520 | yes |
| ART-112 | F | <30  | 650 | yes |
| ART-113 | M | <30  | 190 | yes |
| ART-114 | M | <30  | 365 | yes |
| ART-115 | F | <30  | 325 | yes |

On antiretroviral therapy (ART)

Male (M) and female (F)

Healthy controls (n=60) were 33 males and 27 females.
