# Supplementary material for: Neutrophils promote T-cell activation through the regulated release of CD44-bound Galectin-9 from the cell surface during HIV infection
Source: PubMed Central journal article supplement (PMC8407585; doi:10.1371/journal.pbio.3001387), 2021-08-19
Supplement: pbio.3001387.s010.pdf [file pbio.3001387.s010.pdf]

**Neutrophils promote T-cell activation through the regulated release of CD44-bound Galectin-9 from the cell surface during HIV-infection**  
**Dunsmore et al.**

**Supplemental text 1:** The code used for EdgeR DEG RNA sequencing analysis and heatmapping.

```
# Package Load

library(pheatmap)

library(edgeR)

library(cluster)

library(statmod)

# Set Directory

setwd("~/Documents/RNA Sequencing/Neutrophil Phenotyping/")

# Read Tab Deliminanted file of RAW COUNTS - THIS DOES NOT MEAN

TPM/CPM/RPKM/htsqct/fastqc

Rawdata <- read.delim("HC CD4 Low and CD4 High.txt", row.names = "target_id")

# Group Samples based on Subject

length(Rawdata)

# DGEList Conversion

y <- DGEList(counts=Rawdata[,])

# Filtering and Normalizing

y$samples

# Normalize the data by "Relative Log Expression" (RLE = Log2)

y <- calcNormFactors(y,method=c("RLE"))

#How many surviving samples

head(y$samples)

# Data Exploration
```

# Neutrophils promote T-cell activation through the regulated release of CD44-bound Galectin-9 from the cell surface during HIV-infection

Dunsmore et al.

```
# Multidimensional Scaling
```

```
keep <- rowSums(cpm(y)>2) >= 5
```

```
y <- y[keep, , keep.lib.sizes=FALSE]
```

```
plotMDS(y, top = 5000, col=c(rep("black",5), rep("red",5), rep("blue",5)), gene.selection =  
"common", pch = 16, cex = 2)
```

```
#Conditioning - Experimental treatments to samples are taken into account for differential  
equation analysis
```

```
condition <- factor(c("HC", "HC", "HC", "HC", "HC",  
"CD4 High", "CD4 High", "CD4 High", "CD4 High", "CD4 High",  
"CD4 Low", "CD4 Low", "CD4 Low", "CD4 Low", "CD4 Low"))
```

```
# Estimate Dispersion
```

```
# Organize the data by subject (individual/patient/mouse/etc.)
```

```
subject <- factor(c(1,2,3,4,5,6,7,8,9,10,11,12,13,14,15))
```

```
# Ensure the appropriate subject and conditions match the sample
```

```
data.frame(group=colnames(y),subject,condition)
```

```
# Make the experimental design that will be utilized by the dispersion analysis
```

```
design <- model.matrix(~condition)
```

```
# Subject data to GLM Dispersion - Utilizes the
```

```
# Cox-Reid profile adjusted likelihood method (CR) to perform generalized linear model with
```

```
# design previously mentioned
```

```
# Subject data to GLM Trended Dispersion
```

```
countTable <- estimateGLMTrendedDisp(y, design)
```

```
names (countTable)
```

**Neutrophils promote T-cell activation through the regulated release of CD44-bound Galectin-9 from the cell surface during HIV-infection**  
**Dunsmore et al.**

```
# Subject data to GLM Tagwise Dispersion

summary(countTable$trended.dispersion)

countTable <- estimateGLMTagwiseDisp(countTable, design)

names (countTable)

summary( countTable$tagwise.dispersion )

# Subject Data to GLM Common Dispersion - Verbose

countTable <- estimateGLMCommonDisp(countTable, design, verbose=TRUE)

names (countTable)

summary( countTable$common.dispersion )

# Plot the Biological Coefficient of Variation

plotBCV(countTable)

# Plot Mean Variability to demonstrate the variation

meanVarPlot <- plotMeanVar( countTable ,show.raw.vars=TRUE , show.tagwise.vars=TRUE ,

    show.binned.common.disp.vars=FALSE , show.ave.raw.vars=FALSE ,

    NBlines = TRUE , nbins = 100 ,

    #these are arguments about what is plotted

    pch = 16 , xlab ="Mean Expression (Log10 Scale)" ,

    ylab = "Variance (Log10 Scale)" , main = "Mean-Variance Plot" )

# Differential Expression

# Fit the GLM data to the analysis

fit <- glmFit(countTable, design, robust=TRUE)

# Perform likelihood ratio test on the GLM fit data -
```

# Neutrophils promote T-cell activation through the regulated release of CD44-bound Galectin-9 from the cell surface during HIV-infection

Dunsmore et al.

```
# This test reads out Log Fold Change, Log CPM, Likelihood Ratio, P value, and False  
Discovery Rate
```

```
LRT <- glmLRT(fit, coef =2:3)
```

```
topTags(LRT,n=10)
```

```
# Export Stats findings to a table (n = number of genes being tested (Rows in Rawdata))
```

```
Take <- topTags(LRT,n=200000, sort.by = "none")
```

```
write.table(Take, 'Stats Neutrophils High v Low CD4 Coef2:3.txt', sep="\t")
```

```
top <- rownames(topTags(LRT))
```

```
cpm(y)[top,]
```

```
summary(decideTests(LRT))
```

```
# Plot Mean-Difference
```

```
plotMD(LRT)
```

```
# Add a line at logFC -2 and +2 as these are the cutoffs for heatmapping later on.
```

```
abline(h=c(-2,2), v=(107), col="green")
```

```
# Perform FDR analysis using the Beyer-Hardwick Method
```

```
FDR <- p.adjust(LRT$table$PValue, method="BH")
```

```
# FDR cutoff to demonstrate significant data
```

```
FDRajust <- sum(FDR < 0.05)
```

```
# How many genes are significantly different
```

```
summary(decideTests(FDR))
```

```
# Session info - keep a log of this with publishable formal analysis
```

```
sessionInfo()
```

```
#Heatmapping
```

**Neutrophils promote T-cell activation through the regulated release of CD44-bound Galectin-9 from the cell surface during HIV-infection**

**Dunsmore et al.**

```
# Package Load

library(pheatmap)

library(edgeR)

library(cluster)

library(statmod)

library(factoextra)

library(FactoMineR)

library(ggpubr)

# Set Directory

setwd("~/Documents/RNA Sequencing/Neutrophil Phenotyping/")

# Read Tab Deliminanted file of RAW COUNTS - THIS DOES NOT MEAN

TPM/CPM/RPKM/htsqct/fastqc

Rawdata <- read.delim("DupGone.txt", row.names = "target_id")

PCARaw <- prcomp(Rawdata)

fviz_pca_ind(Rawdata)

# DGEList Conversion

y <- DGEList(counts=Rawdata[,])

# Filtering and Normalizing

y$samples

keep <- rowSums(cpm(y)>2) >= 5

y <- y[keep, , keep.lib.sizes=TRUE]

keep <- rowSums(cpm(y)>2) <= 10

y <- y[keep, , keep.lib.sizes=FALSE]
```

**Neutrophils promote T-cell activation through the regulated release of CD44-bound Galectin-9 from the cell surface during HIV-infection**  
**Dunsmore et al.**

```
# Heat Mapping DGE Data
```

```
logcpm <- cpm(y, prior.count = 0, log=FALSE)
```

```
cal_z_score <- function(x){
```

```
  (x - mean(x)) / sd(x)
```

```
}
```

```
data_subset_norm <- t(apply(logcpm, 1, cal_z_score))
```

```
res <- pheatmap(data_subset_norm, show_rownames = F, clustering_method = "ward.D2",
```

```
clustering_distance_rows = "euclidean", clustering_distance_cols = "euclidean")
```

```
scaled <- scale(logcpm)
```

```
res <- pheatmap(logcpm, show_rownames = F, cutree_cols = 1, clustering_method = "ward.D2",
```

```
clustering_distance_rows = "euclidean", clustering_distance_cols = "euclidean")
```

```
logcpmClust <- cbind(data_subset_norm,
```

```
  cluster = cutree(res$tree_row, k = 5))
```

```
pheatmap(logcpmClust, cutree_cols = 4, show_rownames = F,
```

```
  clustering_method = "ward.D2", clustering_distance_rows = "euclidean",
```

```
clustering_distance_cols = "euclidean")
```

```
write.table(logcpmClust, '2.txt', sep="\t")
```
